# Supplementary material for: Direct probing of acylperoxy radicals during ozonolysis of α -pinene: constraints on radical chemistry and production of highly oxygenated organic molecules
Source: Copernicus journal article supplement (doi:10.5194/acp-23-12691-2023), 2023-10-11
Supplement: Supplementary file 1 [file acp-23-12691-2023-supplement.pdf]

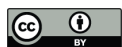

*Supplement of*

**Direct probing of acylperoxy radicals during ozonolysis of  $\alpha$ -pinene:  
constraints on radical chemistry and production of highly  
oxygenated organic molecules**

**Han Zang et al.**

*Correspondence to:* Yue Zhao (yuezhao20@sjtu.edu.cn)

The copyright of individual parts of the supplement might differ from the article licence.

### **S1 Changes in measured RO<sub>2</sub> and closed-shell products as a function of the reacted $\alpha$ -pinene.**

The changes of selected RO<sub>2</sub> and the corresponding closed-shell monomers and dimers as a function of the reacted  $\alpha$ -pinene are consistent with previous studies (Figure S7) (Zhao et al., 2018). The RO<sub>2</sub> signal increases rapidly when the reacted  $\alpha$ -pinene is relatively low, and the increasing rate slows down due to the elevated removal rate of RO<sub>2</sub> via cross-reactions at higher reacted  $\alpha$ -pinene (> 20 ppb). The dimers exhibit opposite trends with RO<sub>2</sub>. As the reacted  $\alpha$ -pinene increases, the increasing rates of the dimers become slightly higher due to the promoted RO<sub>2</sub> cross-reactions. As for the HOM monomers, their signals basically show linear correlations with increasing reacted  $\alpha$ -pinene.

### **S2 Contribution of secondary OH oxidation to the acyl RO<sub>2</sub> formation.**

Considering that the secondary OH oxidation of aldehyde products can also contribute to the formation of acyl RO<sub>2</sub> during ozonolysis of  $\alpha$ -pinene, kinetic model simulations incorporating secondary OH chemistry were also performed under typical experimental conditions. As shown in Figure S9, the acyl RO<sub>2</sub> C<sub>9</sub>H<sub>13</sub>O<sub>4</sub> (C89CO3 in Figure S9a,) and C<sub>10</sub>H<sub>15</sub>O<sub>5</sub> (C920CO3 in Figure S9b) can be formed from both C-C cleavage/H shift of C<sub>10</sub>H<sub>15</sub>O<sub>4</sub>-RO (Figure 4) and OH oxidation of the first-generation aldehyde products. However, the contributions from secondary OH oxidation are negligible for the two acyl RO<sub>2</sub> species during the whole reaction period. In addition, the acyl RO<sub>2</sub> C<sub>10</sub>H<sub>15</sub>O<sub>4</sub> (C96CO3) that can be only formed from OH oxidation of pinonaldehyde contributes to only 0.01% and 0.2% of the total C<sub>10</sub>H<sub>15</sub>O<sub>4</sub>-RO<sub>2</sub> and total acyl RO<sub>2</sub> concentration, respectively (not shown). Therefore, the contribution of secondary OH oxidation to acyl RO<sub>2</sub> in this study is minor and the majority of acyl RO<sub>2</sub> species measured here are formed from the ozonolysis channel.

### **S3 Possible influence of H-scrambling reactions on the behavior of C<sub>10</sub>H<sub>15</sub>O<sub>8</sub> acyl-RO<sub>2</sub>.**

It has been suggested that the functionalized acyl RO<sub>2</sub> radicals with an -OOH group could undergo H-scrambling reactions to form peroxy acids at rates of  $1 \times 10^3$ - $1 \times 10^5$  s<sup>-1</sup> (Knap and Jørgensen, 2017). Here, we performed a model simulation to evaluate the influence of this reaction on the response of the ring-opened acyl C<sub>10</sub>H<sub>15</sub>O<sub>8</sub>-RO<sub>2</sub> to NO<sub>2</sub> addition. As shown in Figure S14, considering a 1,6 H-shift rate of  $1 \times 10^5$  s<sup>-1</sup>, the simulated reduction in total C<sub>10</sub>H<sub>15</sub>O<sub>8</sub>-RO<sub>2</sub> concentration with the addition of 30 ppb NO<sub>2</sub> decreases from 25% to 21% for a C<sub>10</sub>H<sub>15</sub>O<sub>4</sub>-RO<sub>2</sub> yield of 30% (lower limit) and from 31% to 17% for a yield of 89% (higher limit). These results suggest that the H-scrambling reactions of the ring-opened acyl C<sub>10</sub>H<sub>15</sub>O<sub>8</sub>-RO<sub>2</sub> could to certain extent explain the low reduction in its signal upon NO<sub>2</sub> addition.

Table S1 Summary of experimental conditions of  $\alpha$ -pinene ozonolysis with the addition of NO<sub>2</sub>.

| Exp # | $\alpha$ -pinene conc | O <sub>3</sub> conc | NO <sub>2</sub> conc | Reacted $\alpha$ -pinene |
|-------|-----------------------|---------------------|----------------------|--------------------------|
| 1     | 500                   | 45                  | 0                    | 2.4                      |
| 2     | 500                   | 45                  | 3                    | 2.4                      |
| 3     | 500                   | 45                  | 7                    | 2.4                      |
| 4     | 500                   | 45                  | 10                   | 2.4                      |
| 5     | 500                   | 45                  | 15                   | 2.4                      |
| 6     | 500                   | 45                  | 20                   | 2.4                      |
| 7     | 500                   | 45                  | 30                   | 2.4                      |
| 8     | 1000                  | 45                  | 0                    | 4.8                      |
| 9     | 1000                  | 45                  | 3                    | 4.8                      |
| 10    | 1000                  | 45                  | 7                    | 4.8                      |
| 11    | 1000                  | 45                  | 10                   | 4.8                      |
| 12    | 1000                  | 45                  | 15                   | 4.8                      |
| 13    | 1000                  | 45                  | 20                   | 4.8                      |
| 14    | 1000                  | 45                  | 30                   | 4.8                      |
| 15    | 2000                  | 45                  | 0                    | 9.3                      |
| 16    | 2000                  | 45                  | 3                    | 9.3                      |
| 17    | 2000                  | 45                  | 7                    | 9.3                      |
| 18    | 2000                  | 45                  | 10                   | 9.3                      |
| 19    | 2000                  | 45                  | 15                   | 9.3                      |
| 20    | 2000                  | 45                  | 20                   | 9.3                      |
| 21    | 2000                  | 45                  | 30                   | 9.3                      |
| 22    | 500                   | 180                 | 0                    | 9.6                      |
| 23    | 500                   | 180                 | 3                    | 9.6                      |
| 24    | 500                   | 180                 | 7                    | 9.6                      |
| 25    | 500                   | 180                 | 10                   | 9.6                      |
| 26    | 500                   | 180                 | 15                   | 9.6                      |
| 27    | 500                   | 180                 | 20                   | 9.6                      |
| 28    | 500                   | 180                 | 30                   | 9.6                      |
| 29    | 3000                  | 45                  | 0                    | 13.5                     |
| 30    | 1000                  | 180                 | 0                    | 18.9                     |
| 31    | 2000                  | 180                 | 0                    | 36.8                     |
| 32*   | 2000                  | 45                  | 0                    | 5.0                      |

\* 500 ppm cyclohexane was added as an OH scavenger in this experiment.

Table S2 Summary of experimental conditions of  $\alpha$ -pinene ozonolysis with the addition of NO.

| Exp # | $\alpha$ -pinene conc | O <sub>3</sub> conc | NO conc | Reacted $\alpha$ -pinene |
|-------|-----------------------|---------------------|---------|--------------------------|
| 33    | 500                   | 45                  | 3       | 2.8                      |
| 34    | 500                   | 45                  | 7       | 3.6                      |
| 35    | 500                   | 45                  | 10      | 4.2                      |
| 36    | 500                   | 45                  | 15      | 4.8                      |
| 37    | 500                   | 45                  | 20      | 5.1                      |
| 38    | 500                   | 45                  | 30      | 5.3                      |
| 39    | 1000                  | 45                  | 3       | 5.2                      |
| 40    | 1000                  | 45                  | 7       | 6.0                      |
| 41    | 1000                  | 45                  | 10      | 6.7                      |
| 42    | 1000                  | 45                  | 15      | 7.8                      |
| 43    | 1000                  | 45                  | 20      | 8.6                      |
| 44    | 1000                  | 45                  | 30      | 9.6                      |
| 45    | 2000                  | 45                  | 3       | 9.6                      |
| 46    | 2000                  | 45                  | 7       | 10.4                     |
| 47    | 2000                  | 45                  | 10      | 11.1                     |
| 48    | 2000                  | 45                  | 15      | 12.3                     |
| 49    | 2000                  | 45                  | 20      | 13.4                     |
| 50    | 2000                  | 45                  | 30      | 15.5                     |
| 51    | 500                   | 180                 | 3       | 9.8                      |
| 52    | 500                   | 180                 | 7       | 10.4                     |
| 53    | 500                   | 180                 | 10      | 10.8                     |
| 54    | 500                   | 180                 | 15      | 11.5                     |
| 55    | 500                   | 180                 | 20      | 12.2                     |
| 56    | 500                   | 180                 | 30      | 13.3                     |

Table S3 Major modifications in MCM mechanisms.

| #  | Reactions                                    | k (s <sup>-1</sup> or cm <sup>3</sup> molecule <sup>-1</sup> s <sup>-1</sup> ) |
|----|----------------------------------------------|--------------------------------------------------------------------------------|
| 1  | APINENE + O3 = 0.5 × APINOOA + 0.5 × APINOOB | 8.05E-16.*exp(-640./T)                                                         |
| 2  | APINOOA = Z-APINAOO                          | KDEC*0.09                                                                      |
| 3  | APINOOA = E-APINAOO                          | KDEC*0.09                                                                      |
| 4  | APINOOA = C107O2 + OH                        | KDEC*0.45                                                                      |
| 5  | APINOOA = C109O2 + OH                        | KDEC*0.37                                                                      |
| 6  | APINOOB = Z-APINBOO                          | KDEC*0.10                                                                      |
| 7  | APINOOB = E-APINBOO                          | KDEC*0.10                                                                      |
| 8  | APINOOB = PINONIC                            | KDEC*0.16                                                                      |
| 9  | APINOOB = C10H15O4KBRO2 + OH                 | KDEC*0.49                                                                      |
| 10 | APINOOB = C10H15O4RBRO2 + OH                 | KDEC*0.5*0.3                                                                   |
| 11 | C107O2 = C10H15O6R1RO2                       | 0.14                                                                           |
| 12 | C109O2 = C10H15O6R1RO2                       | 0.02                                                                           |
| 13 | C10H15O4KBRO2 = C10H15O6KBRO2                | 0.29                                                                           |
| 14 | C10H15O4RBRO2 = C10H15O6RBRO2                | 1                                                                              |
| 15 | RO2 + NO2 = ROONO2                           | 7.5E-12                                                                        |
| 16 | ROONO2 = RO2 + NO2                           | 5                                                                              |

Table S4 Wall loss fractions of OH, HO<sub>2</sub>, and RO<sub>2</sub> radicals, as well as HOM monomers and dimers under different reaction conditions

| Species                          | $D_{gas}$<br>(cm <sup>2</sup><br>s <sup>-1</sup> ) | $k_{wall}$<br>(s <sup>-1</sup> ) | Wall loss fractions (%)                      |                                              |                                              |                                                 |
|----------------------------------|----------------------------------------------------|----------------------------------|----------------------------------------------|----------------------------------------------|----------------------------------------------|-------------------------------------------------|
|                                  |                                                    |                                  | 500 ppb $\alpha$ p<br>+45 ppb O <sub>3</sub> | 1 ppm<br>$\alpha$ p+45 ppb<br>O <sub>3</sub> | 2 ppm<br>$\alpha$ p+45 ppb<br>O <sub>3</sub> | 500 ppb<br>$\alpha$ p+180<br>ppb O <sub>3</sub> |
| OH                               | 0.23                                               | 0.0537                           | 0.14                                         | 0.11                                         | 0.08                                         | 0.08                                            |
| HO <sub>2</sub>                  | 0.15                                               | 0.0354                           | 9.08                                         | 6.71                                         | 4.89                                         | 4.74                                            |
| C <sub>7</sub> -RO <sub>2</sub>  | 0.07                                               | 0.0171                           | 13.9                                         | 11.9                                         | 9.8                                          | 9.6                                             |
| C <sub>8</sub> -RO <sub>2</sub>  | 0.07                                               | 0.0171                           | 25.5                                         | 21.5                                         | 18.0                                         | 17.7                                            |
| C <sub>9</sub> -RO <sub>2</sub>  | 0.07                                               | 0.0171                           | 16.4                                         | 16.2                                         | 14.5                                         | 14.3                                            |
| C <sub>10</sub> -RO <sub>2</sub> | 0.05                                               | 0.0125                           | 11.5                                         | 9.3                                          | 7.4                                          | 7.3                                             |
| C <sub>7</sub> -HOM              | 0.07                                               | 0.0171                           | 24.3                                         | 23.3                                         | 22.5                                         | 22.3                                            |
| C <sub>8</sub> -HOM              | 0.07                                               | 0.0171                           | 34.7                                         | 31.0                                         | 28.1                                         | 27.8                                            |
| C <sub>9</sub> -HOM              | 0.07                                               | 0.0171                           | 29.0                                         | 27.5                                         | 26.1                                         | 25.9                                            |
| C <sub>10</sub> -HOM             | 0.05                                               | 0.0125                           | 22.3                                         | 20.3                                         | 18.6                                         | 18.4                                            |
| C <sub>14-15</sub> -dimers       | 0.05                                               | 0.0125                           | 33.1                                         | 30.5                                         | 27.8                                         | 27.6                                            |
| C <sub>16-19</sub> -dimers       | 0.03                                               | 0.0079                           | 25.4                                         | 22.6                                         | 20.0                                         | 19.7                                            |
| C <sub>20</sub> -dimers          | 0.03                                               | 0.0079                           | 17.5                                         | 15.8                                         | 14.4                                         | 14.2                                            |

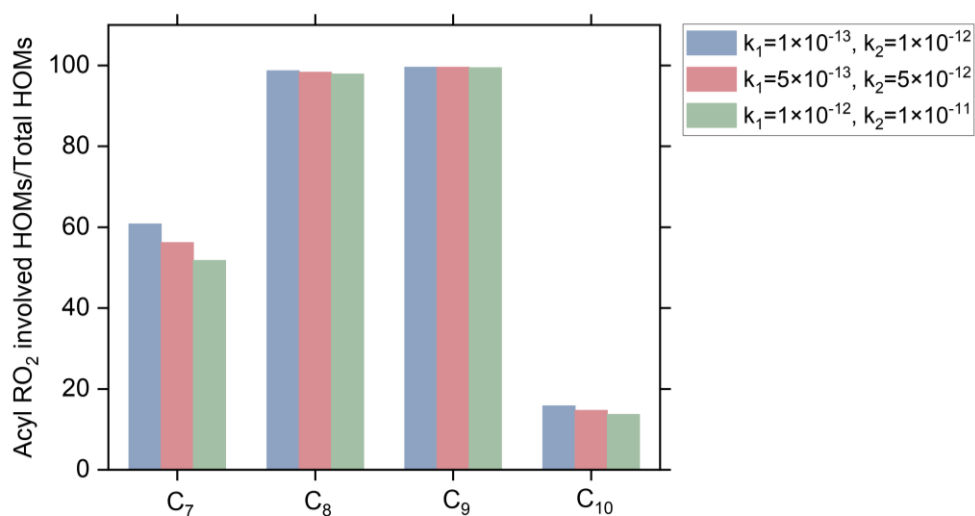

Figure S1 Influences of the dimer formation rate on the acyl RO<sub>2</sub>-involved HOM formation.  $k_1$  and  $k_2$  are the dimer formation rates for alkyl and acyl RO<sub>2</sub>, respectively, and the unit is cm<sup>3</sup> molecule<sup>-1</sup> s<sup>-1</sup>.

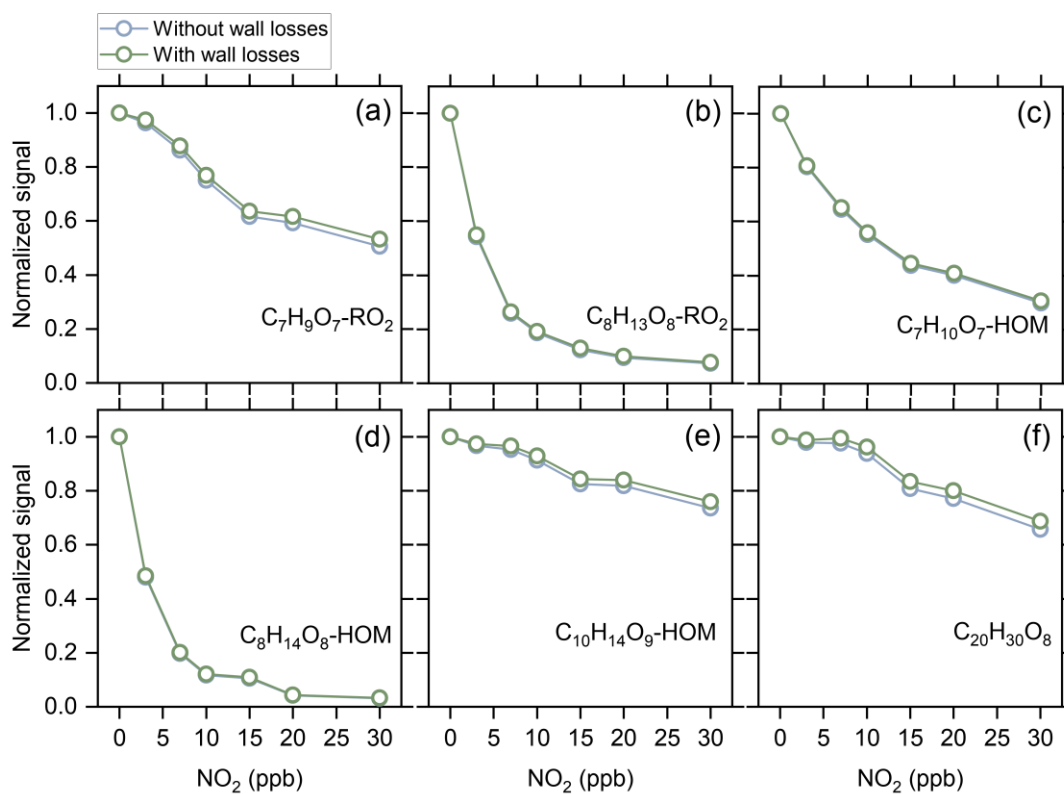

Figure S2 Normalized signal of typical RO<sub>2</sub>, HOM monomers and dimers as a function of the added NO<sub>2</sub> concentration with/without considering wall losses (Taking Exps 8-14 as an example).

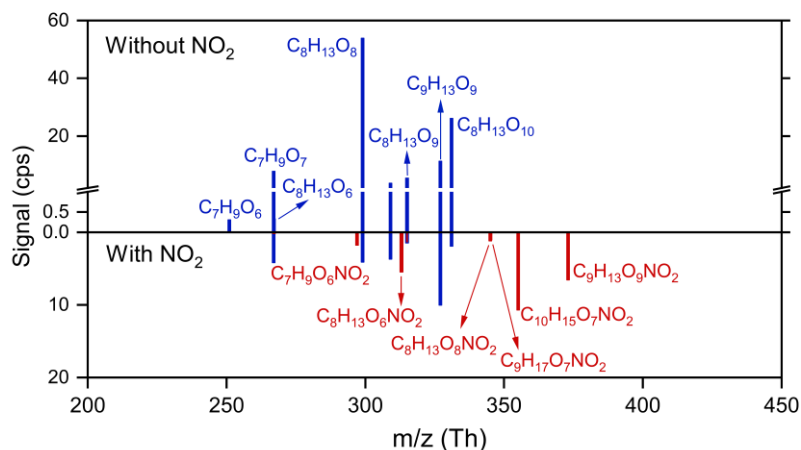

Figure S3 Signals of measured acyl RO<sub>2</sub> and the related RC(O)OONO<sub>2</sub> with and without the addition of NO<sub>2</sub> (Exps 8 and 14).

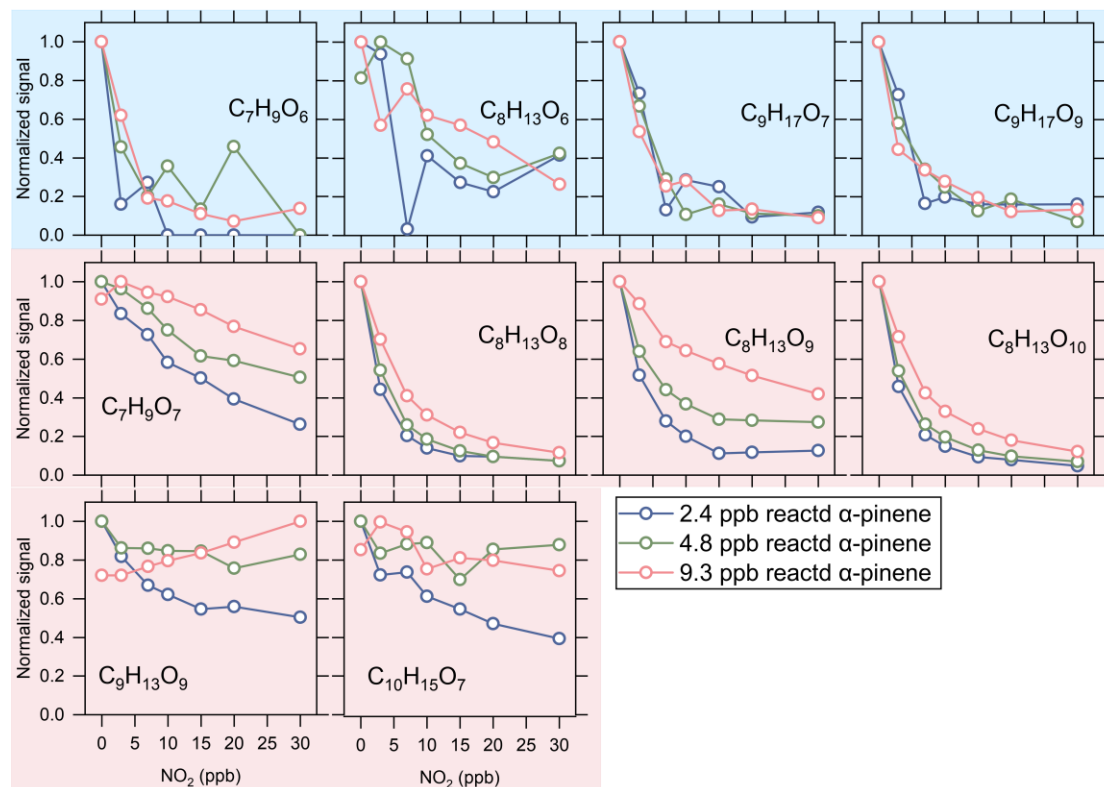

Figure S4 Normalized signal of the measured acyl RO<sub>2</sub> as a function of the added NO<sub>2</sub> concentration (Exps 1-21). The data are categorized according to the effects of reacted  $\alpha$ -pinene on the decreasing extents of acyl RO<sub>2</sub> signal, which are indicated by different background colors (blue: no obvious effects, pink: the decreasing extent becomes lower when reacted  $\alpha$ -pinene increases).



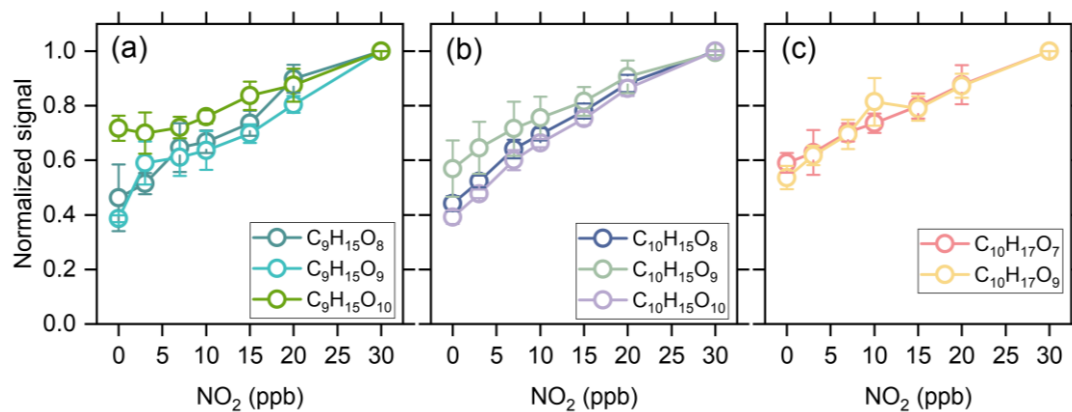

Figure S5 Averaged normalized signal of the measured alkyl RO<sub>2</sub> as a function of the added NO<sub>2</sub> concentration (Exps 1-28).

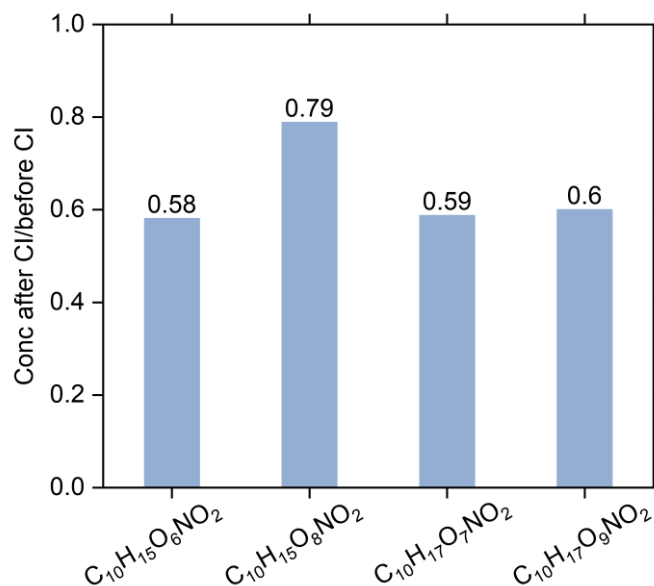

Figure S6 Ratio of simulated concentration of ROONO<sub>2</sub> after leaving the chemical ionization inlet to the concentration before into the chemical ionization inlet (abbreviated as CI in the figure, the experimental conditions are same as Exp 14), the acyl RO<sub>2</sub> C<sub>10</sub>H<sub>15</sub>O<sub>8</sub> reported by Iyer et al. (2021) is included in the model, therefore the decomposition of the whole ROONO<sub>2</sub> is relatively lower.

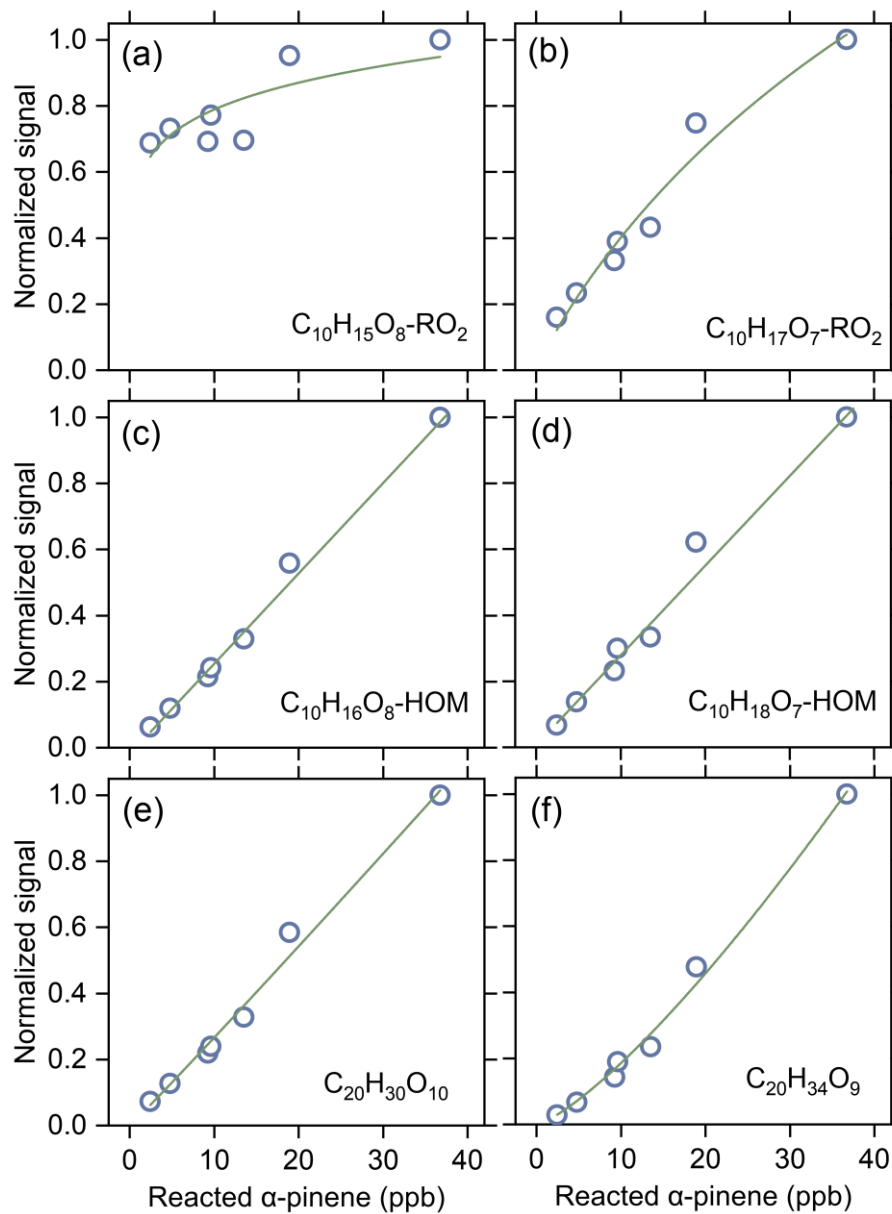

Figure S7 Normalized signal of selected  $RO_2$  as well as closed-shell monomers and dimers as a function of the reacted  $\alpha$ -pinene (Exps 1, 8, 15, 22, and 29-31).

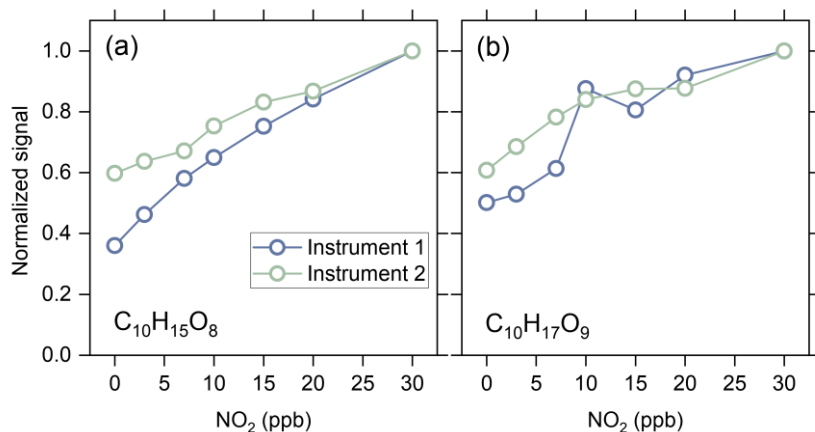

Figure S8 Changes of typical alkyl RO<sub>2</sub> signal with different NO<sub>2</sub> concentration measured by two nitrate-CIMS under the same experimental conditions (Exps15-21). Instrument 1 is the nitrate-CIMS we used in this study.

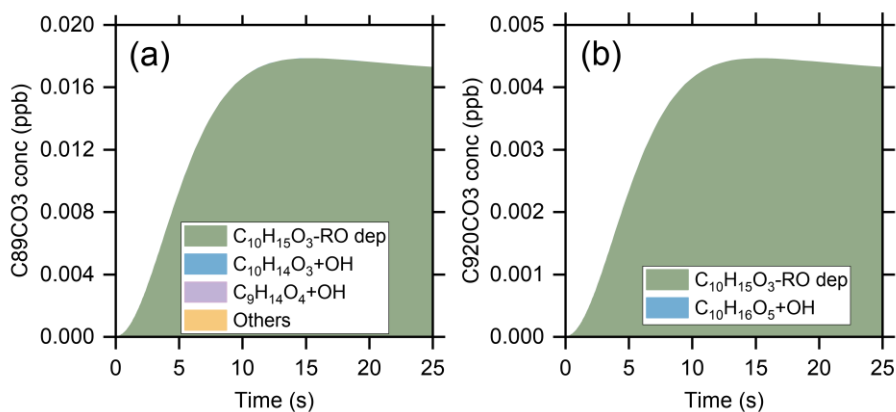

Figure S9 Simulated contribution of different processes to the formation of (a) C<sub>9</sub>H<sub>13</sub>O<sub>4</sub> (C89CO<sub>3</sub>) and (b) C<sub>10</sub>H<sub>15</sub>O<sub>5</sub> (C920CO<sub>3</sub>) acyl-RO<sub>2</sub> during ozonolysis of  $\alpha$ -pinene (Exp 22, 500 ppb  $\alpha$ -pinene + 180 ppb O<sub>3</sub>).

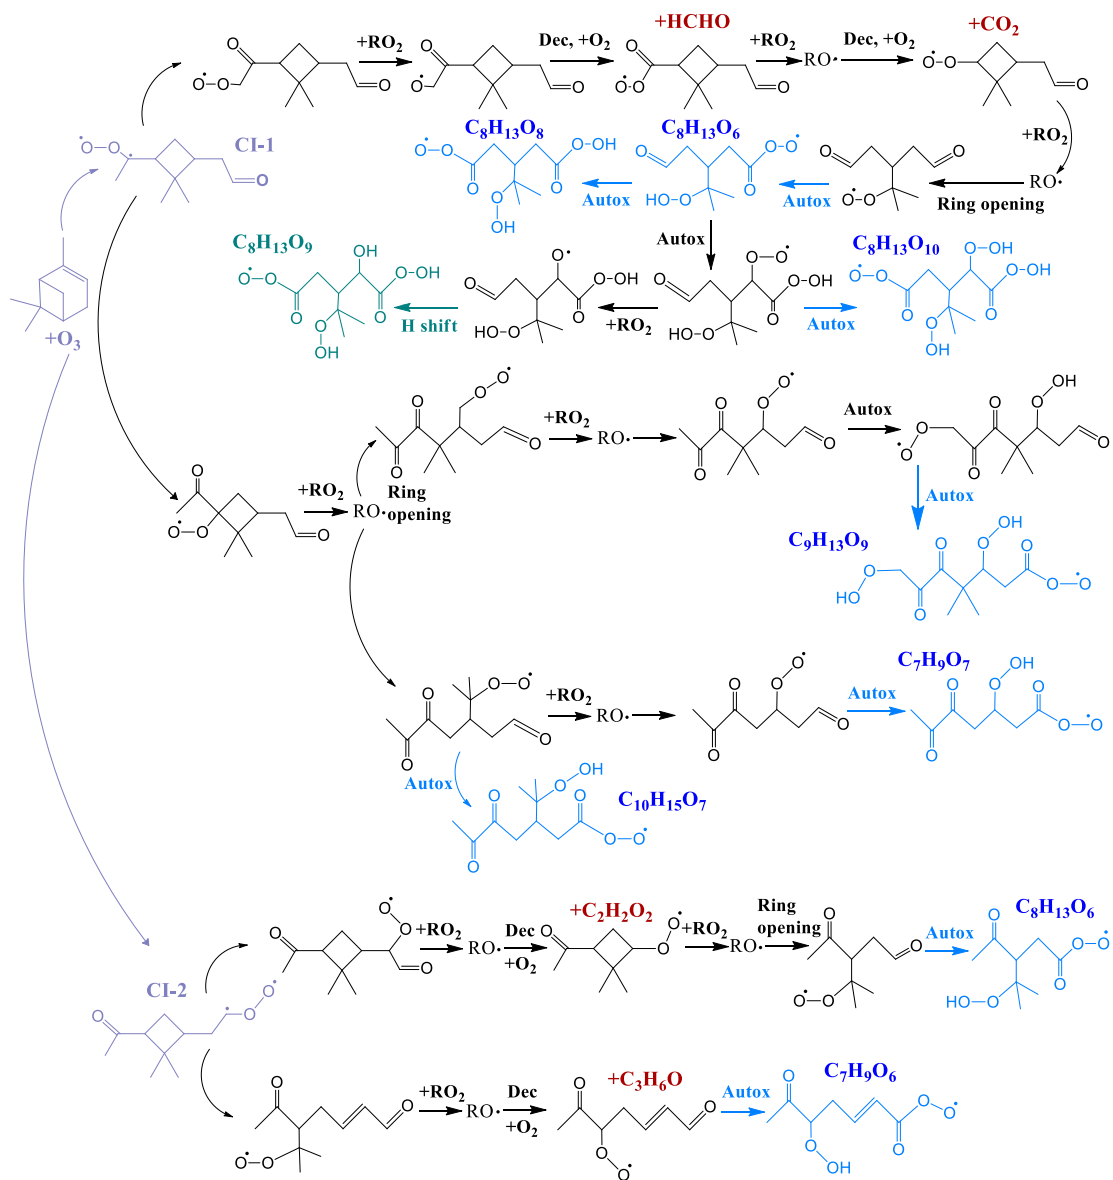

Figure S10 Formation mechanisms of the acyl RO<sub>2</sub> measured in this study.

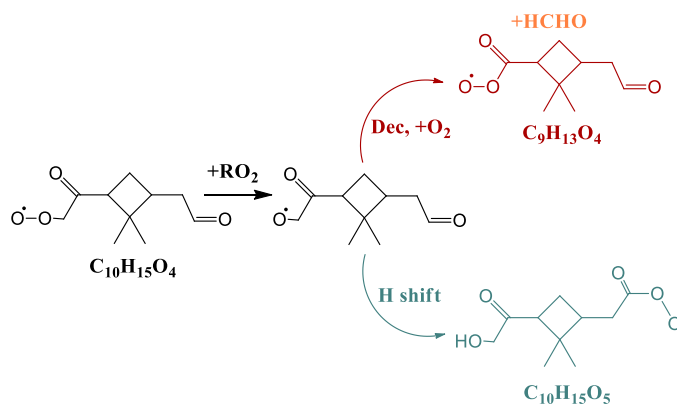

Figure S11 Formation pathways of the acyl RO<sub>2</sub> with oxygen atoms less than 6 in default MCM v3.3.1.

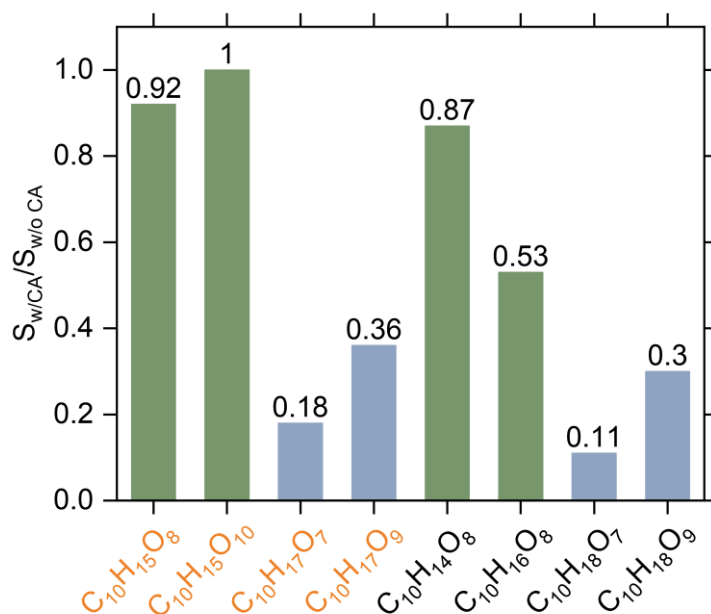

Figure S12 Relative changes in signal of typical  $C_{10}$   $RO_2$  and HOM monomers due to the addition of 500 ppm cyclohexane (Exp 32), the yellow species are  $RO_2$  radicals.

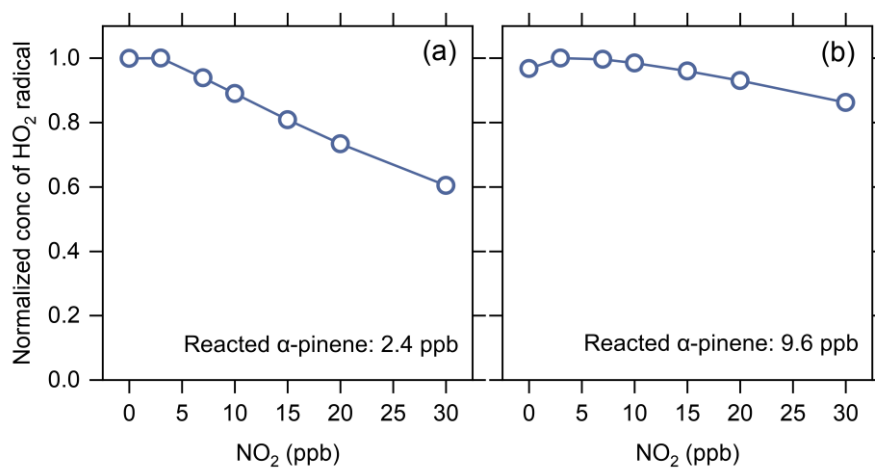

Figure S13 Normalized simulated concentration of the  $HO_2$  radicals as a function of  $NO_2$  concentration under low (2.4 ppb, a) and high (9.6 ppb, b) reacted  $\alpha$ -pinene conditions.

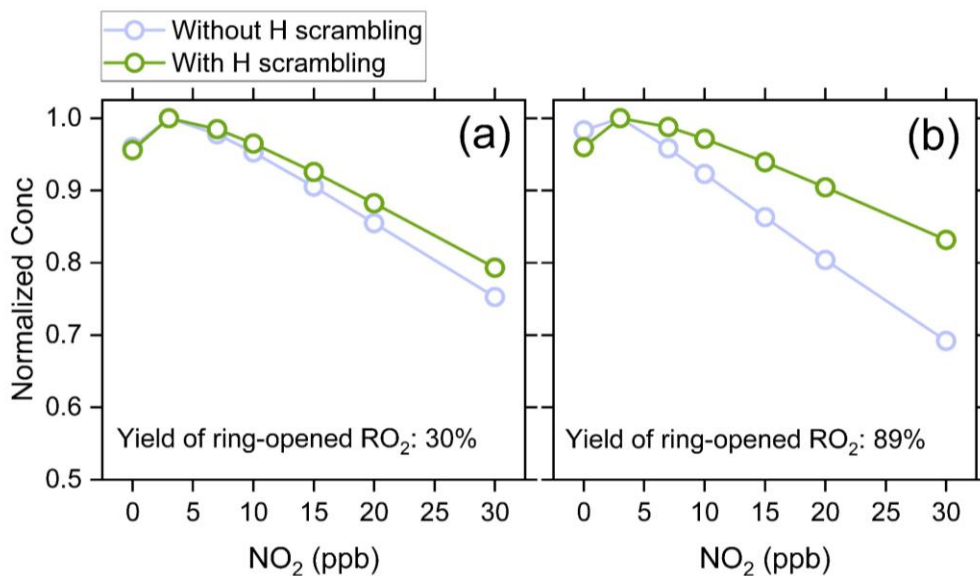

Figure S14 Simulated influences of the H-scrambling reaction on the behavior of the ring-opened acyl  $C_{10}H_{15}O_8-RO_2$  as a function of added  $NO_2$  concentration (Exps 8-14). A 1,6 H-scrambling rate of  $1 \times 10^5 \text{ s}^{-1}$  and an alkyl  $RO_2+NO_2$  rate coefficient of  $5 \times 10^{-12} \text{ cm}^3 \text{ molecule}^{-1} \text{ s}^{-1}$  were used in the model.

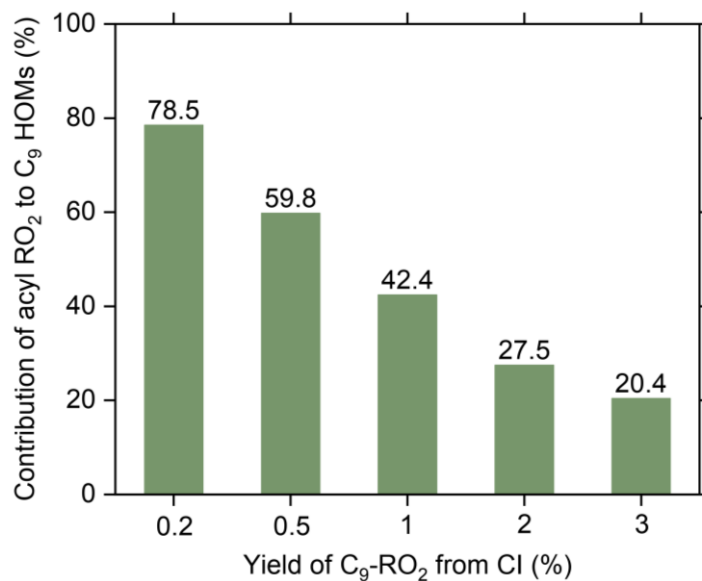

Figure S15 Influences of  $C_9H_{15}O_3-RO_2$  production from one of the CIs on the formation of  $C_9$  acyl  $RO_2$  related HOMs (Taking Exp 8 as an example).

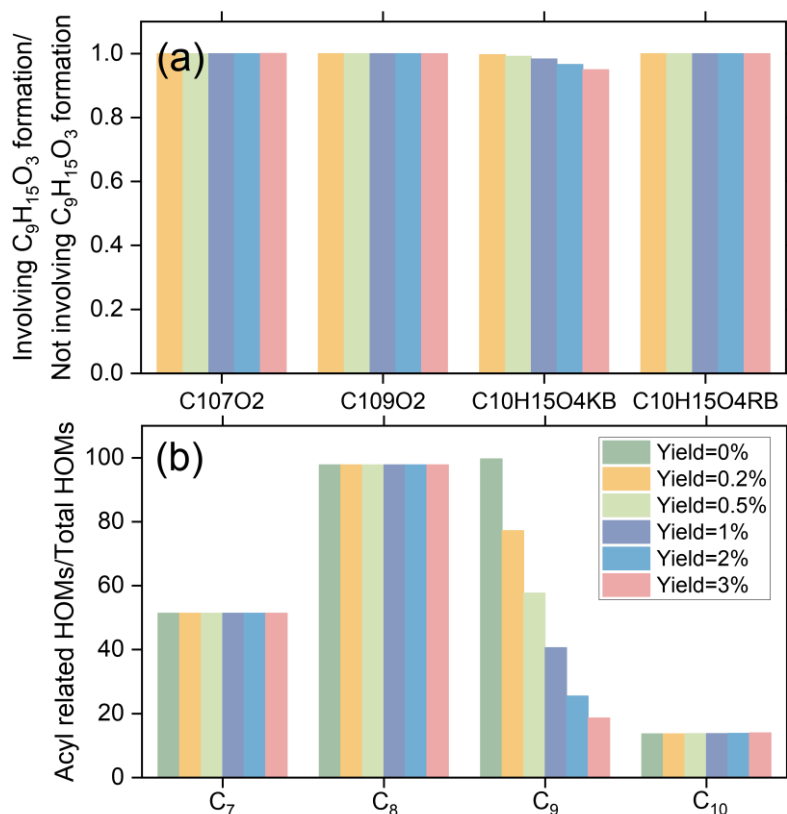

Figure S16 Influences of  $C_9H_{15}O_3$ - $RO_2$  production on (a) the yield of  $C_{10}H_{15}O_4$ - $RO_2$  and (b) the contribution of acyl  $RO_2$  to total  $C_7$ - $C_{10}$  HOMs (Taking Exp 8 as an example). The C10H15O4KB and C10H15O4RB denote a ring-retaining and a ring-opened  $C_{10}H_{15}O_4$ - $RO_2$ , respectively (see Table S3 and the main text).

## References

- Iyer, S., Rissanen, M. P., Valiev, R., Barua, S., Krechmer, J. E., Thornton, J., Ehn, M., and Kurten, T.: Molecular mechanism for rapid autoxidation in alpha-pinene ozonolysis, *Nat. Commun.*, 12, 878, <https://doi.org/10.1038/s41467-021-21172-w>, 2021.
- Knap, H. C. and Jørgensen, S.: Rapid Hydrogen Shift Reactions in Acyl Peroxy Radicals, *J. Phys. Chem. A*, 121, 1470-1479, [10.1021/acs.jpca.6b12787](https://doi.org/10.1021/acs.jpca.6b12787), 2017.
- Zhao, Y., Thornton, J. A., and Pye, H. O. T.: Quantitative constraints on autoxidation and dimer formation from direct probing of monoterpene-derived peroxy radical chemistry, *Proc. Natl. Acad. Sci. U. S. A.*, 115, 12142-12147, <https://doi.org/10.1073/pnas.1812147115>, 2018.
